# Supplementary material for: End stage renal disease patients have a skewed T cell receptor Vβ repertoire
Source: PubMed Central journal article supplement (PMC4681023; doi:10.1186/s12979-015-0055-7), 2015-12-14
Supplement: 12979_2015_55_MOESM1_ESM.pdf [file 12979_2015_55_MOESM1_ESM.pdf]

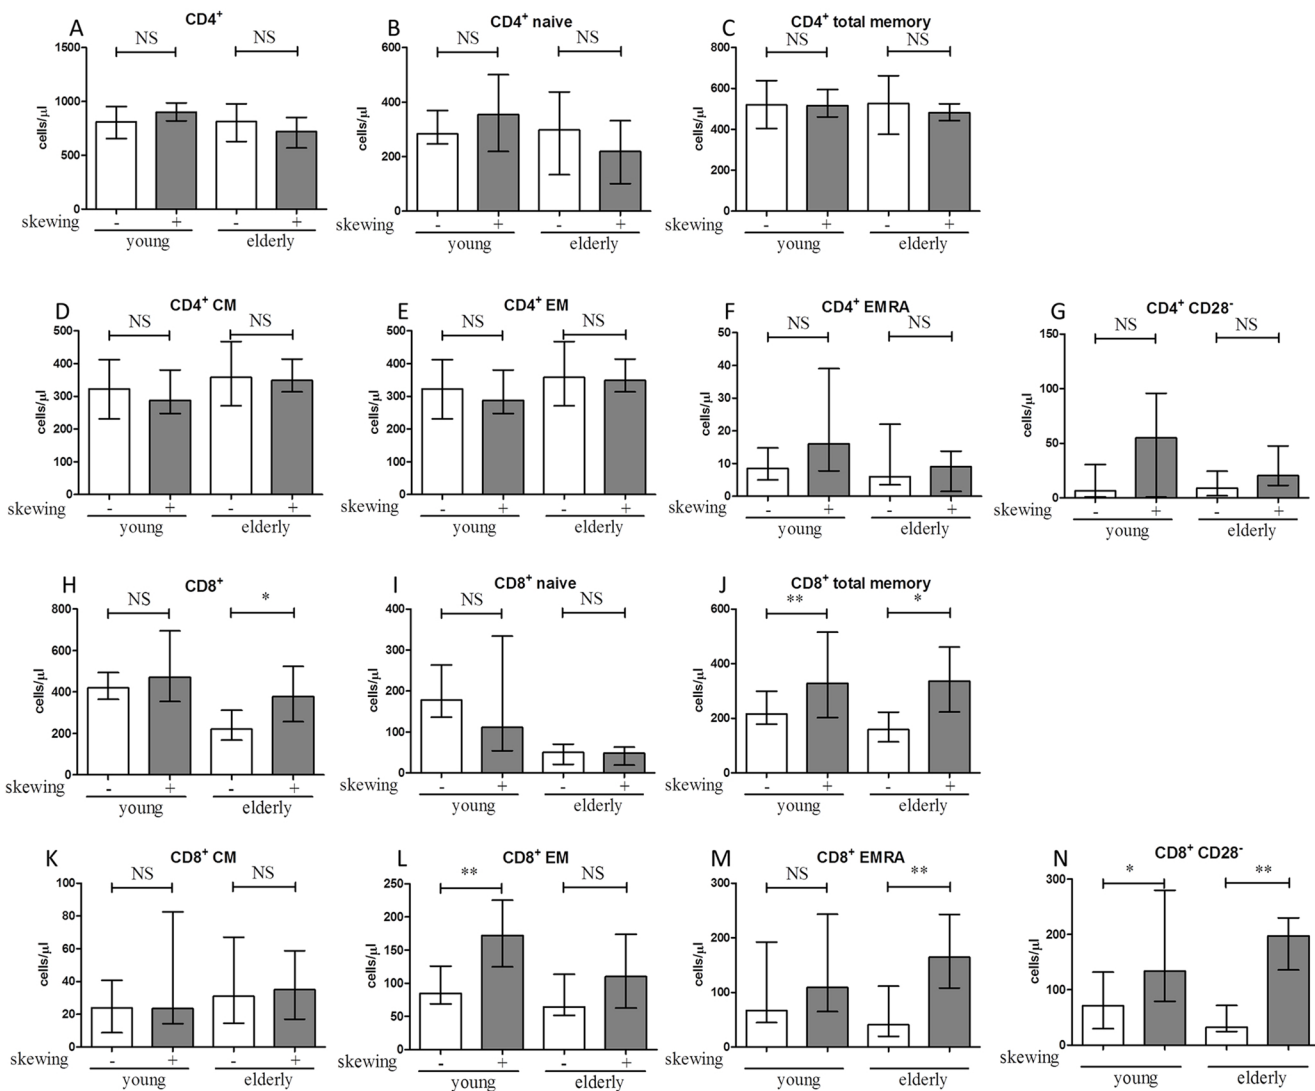

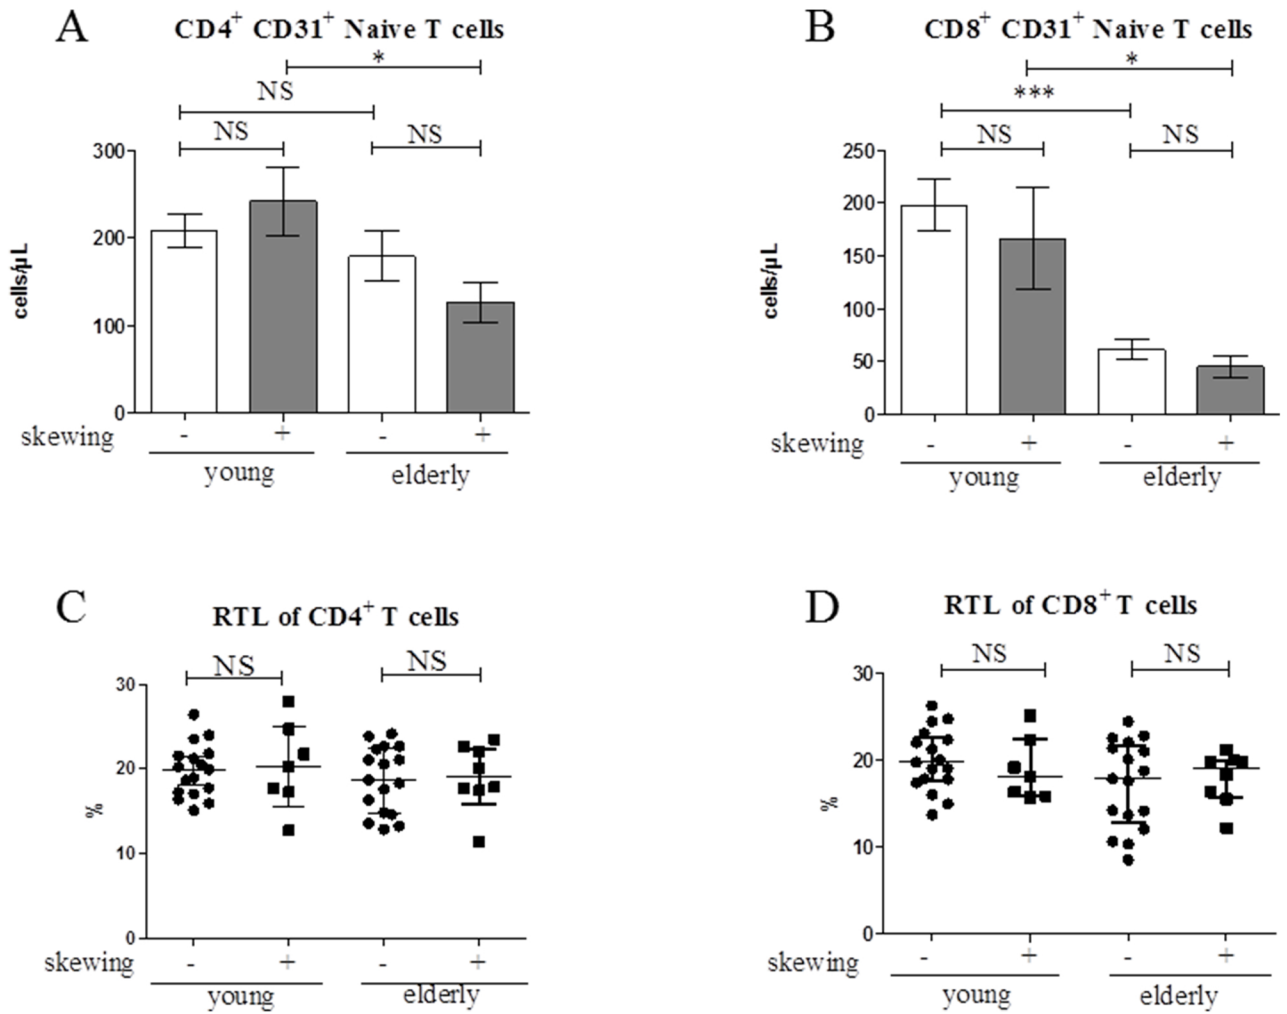

Supplementary Figure 2. **Absolute number of CD31-expressing naïve and relative telomere length (RTL) of  $CD4^+$  and  $CD8^+$  T cells of healthy individuals (HI) with skewing in TCR  $V\beta$  repertoire compared to age-match HI without skewing in TCR  $V\beta$  repertoire.** Number of (A)  $CD31^+ CD4^+$  naïve and (B)  $CD31^+ CD8^+$  naïve T cells, in addition with RTL of (C)  $CD4^+$  and (D)  $CD8^+$  T cells are shown. Data are given in median with interquartile range. Open bars represent absolute number of CD31- expressing naïve T cells of HI with a non-skewed TCR  $V\beta$  repertoire (young n=18; elderly n=17) and closed bars correspond patients with a skewed TCR  $V\beta$  repertoire (young n=8, elderly n=8). Triangles represent the RTL of patients with a non-skewed TCR  $V\beta$  repertoire (young=17, n=17) and squares correspond patients with a skewed TCR  $V\beta$  repertoire (young n=7, elderly n=8). \* $<0.05$ ; \*\* $<0.01$ ; \*\*\* $<0.001$ ; NS: not significant



A

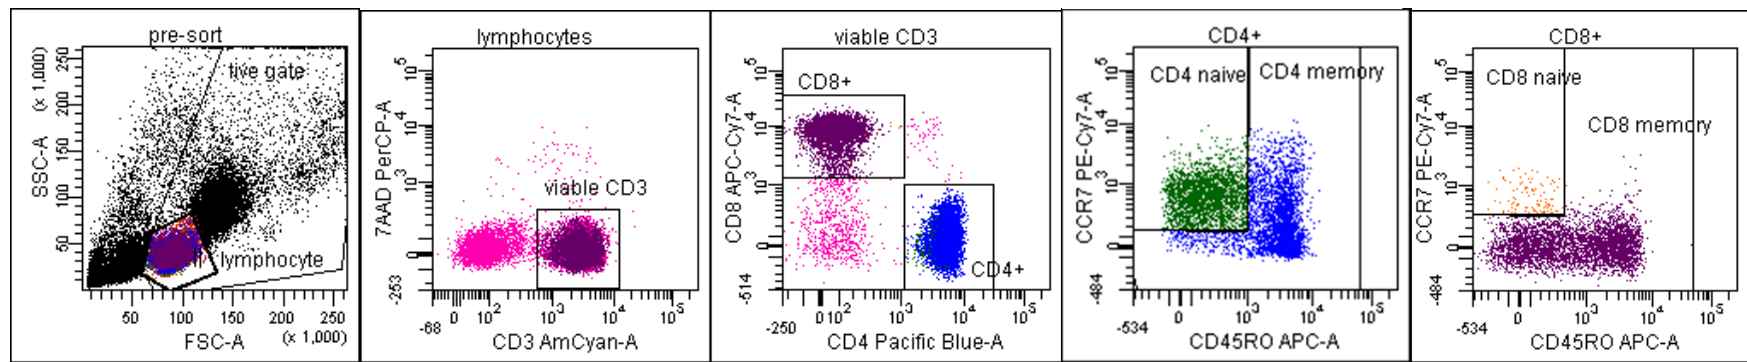

B

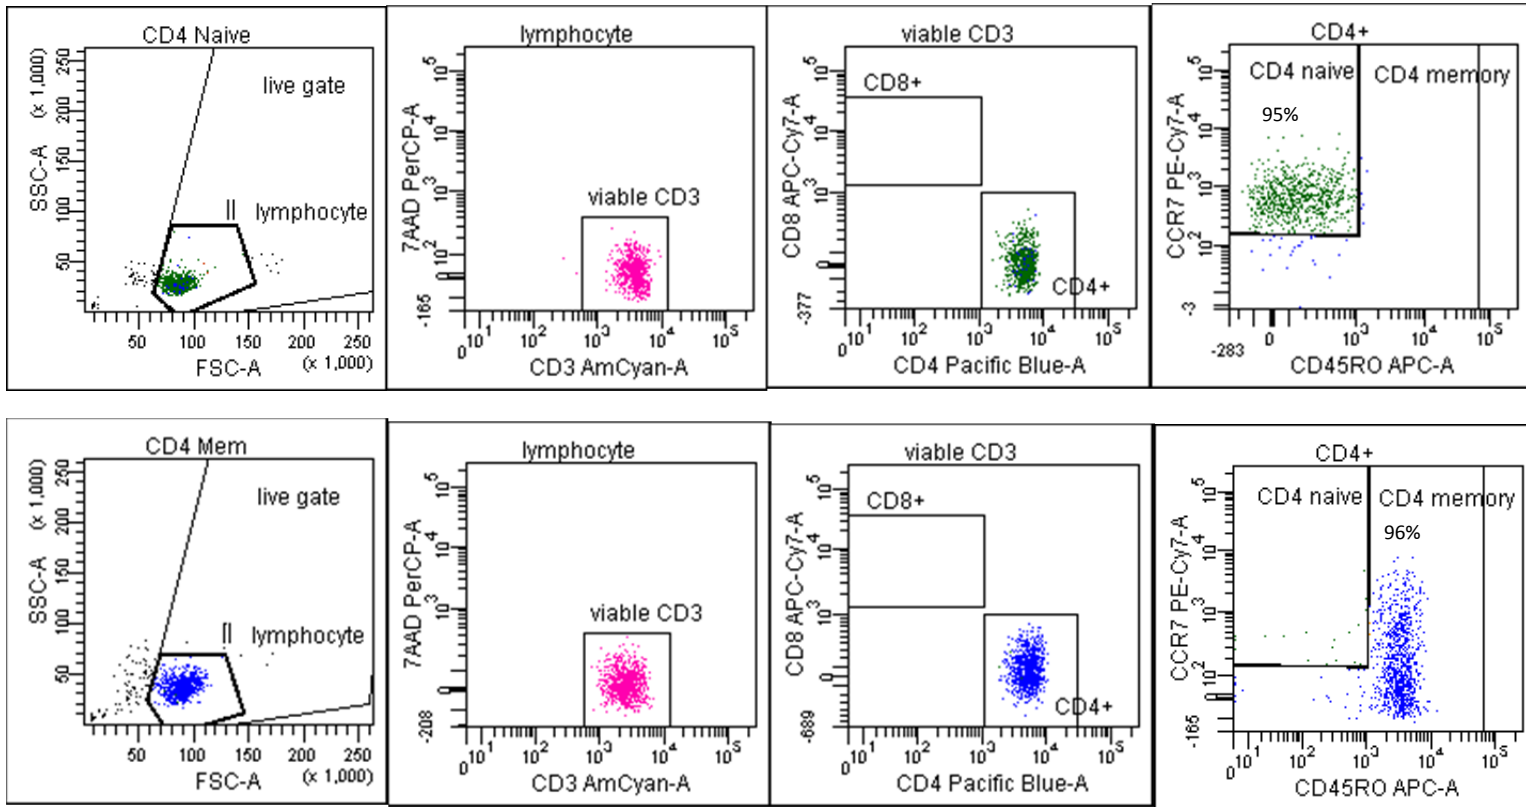

**Supplementary Figure 3. A typical example of the gating strategy to dissect the different T cell subsets prior to sorting (A) and the analysis of the purity of CD4<sup>+</sup> naive/memory sorted samples (B).** Purity is determined by assessing the frequency of a particular T cell subset within the live gate of that sorted samples, i.e. the frequency of CD4<sup>+</sup> naive T cells within total live cells in the naive-sorted sample.

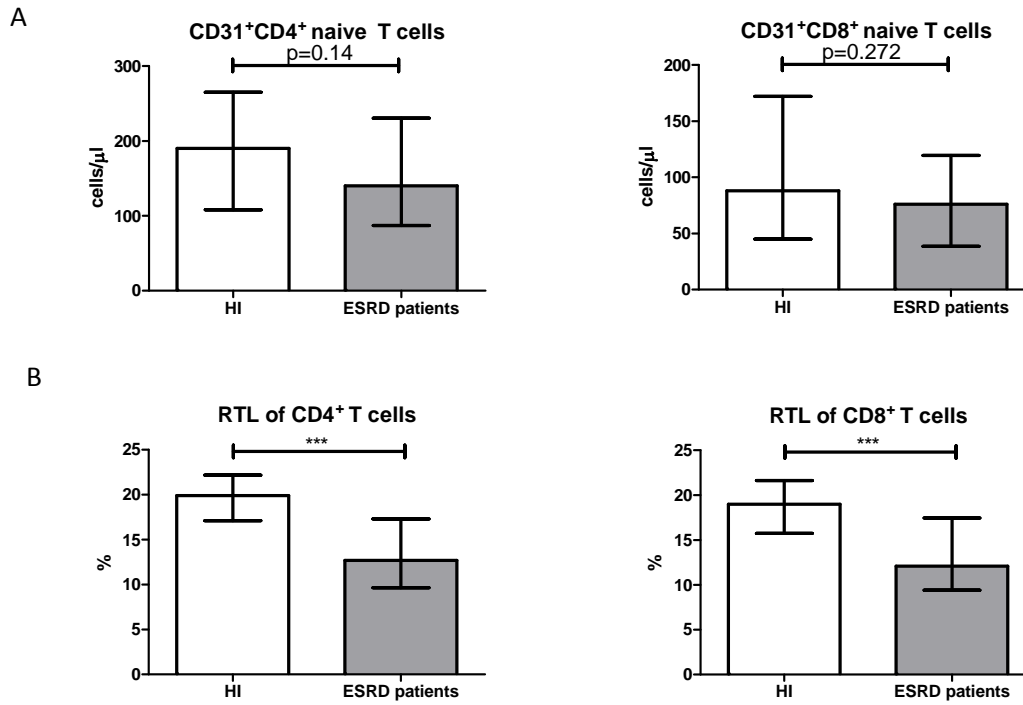

**Supplementary Figure 4. Numbers of CD31-expressing T cells between the ESRD patients (N=45) and healthy individuals (N=51) (A) and relative telomere length (RTL) between ESRD patients (N=37) and HI (n=49) (B). Open bars represent HI and closed bars correspond to HI. Data are given as median with interquartile range. P values are given and \*\*\* means the P value is lower than 0.001.**

## **Supplementary materials and methods**

### **Circulating T cell numbers and their differentiation status**

Absolute numbers of T cells were obtained using BD TruCount™ tubes. Briefly, 20 µl of the 6-color TBNK reagent (BD Multitest™, BD Bioscience) was used in combination with a TruCount™ tube (BD Biosciences) and 50 µl of EDTA blood. This tube contains a fixed number of beads (i.e. bead count; lot-specific) which enables calculation of absolute numbers of cells per µl of blood. The 6-color TBNK reagent contains fluorescein isothiocyanate (FITC)-labeled anti-CD3, phycoerythrin (PE) labeled anti-CD16/CD56, peridinin chlorophyll protein (PerCP) - cyanine dye (CY)™5.5-labeled anti-CD45, PE-Cy™7- labeled anti-CD4, allophycocyanin (APC) - labeled anti-CD19, APC-Cy7 labeled anti-CD8.

Analysis of the T cell differentiation status was performed using flow-cytometry following the whole blood staining protocol. Briefly, whole blood was stained with AmCyan-labeled anti-CD3 (BD) in combination with pacific blue (PB)-labeled anti-CD4 (BD) and APC-Cy7-labeled anti-CD8 (BD). T cells were defined as CD4<sup>+</sup> or CD8<sup>+</sup> and further defined into four different subsets based on the expression of CCR7 and CD45RO using FITC- labeled anti-CCR7 (R&D systems, Uithoorn, The Netherlands) and APC-labeled anti-CD45RO (BD). Naive T cells were identified as CCR7<sup>+</sup> and CD45RO<sup>-</sup>, central memory (CM) cells as CCR7<sup>+</sup> and CD45RO<sup>+</sup>, effector memory (EM) cells as CCR7<sup>-</sup> and CD45RO<sup>+</sup> and the highly differentiated effector memory (EMRA) cells as CCR7<sup>-</sup> and CD45RO<sup>-</sup>. T-cell differentiation is associated with loss of CD28 expression on the cell surface. Numbers of CD28<sup>-</sup> (or CD28null) T cells within the T-cell subsets were determined by staining with PerCP-Cy5.5-labeled anti-CD28 (BD). Thymic output was analyzed by determining numbers of CD31-expressing cells within the naive T-cell pool

upon staining with PE-labeled anti-CD31 (Biolegend, Europe BV, Uithoorn, the Netherlands). Samples were measured on the FACSCanto II (BD) acquiring at least  $5 \times 10^4$  T lymphocytes.

### **Sorting of T cell subsets**

PBMCs were stained with AmCyan-labeled CD3 (BD Pharmingen, Erembodegem, Belgium), Pacific Blue-labeled CD4 (BD), APC-Cy7- labeled CD8 (BD); APC-labeled CD45RO (BD), PE-CY7-labeled CCR7 (R&D systems, Uithoorn, The Netherlands) and a live-dead marker ViaProbe (7-Aminoactinomycin D, BD) was included. After staining, the cells were washed and resuspended at  $20\text{-}25 \times 10^6/\text{mL}$  and sorted into CD4+ and CD8+ Naïve/memory T cells (BD FACSAria™ II SORP, BD). Naive T cells were identified as CCR7+ and CD45RO- and the remaining CD4+ or CD8+ T cells were collected as memory T cells.

### **Telomere length assay**

Briefly, PBMCs were thawed and stained with either anti-CD4-biotin (Beckman-Coulter, BV, Woerden, the Netherlands) or anti-CD8-biotin (Biolegend) followed by staining with streptavidin-Cy5 (Biolegend). After fixation and permeabilization, the telomere length of T cells was determined using the telomere PNA-kit/FITC (Dako BV, Heverlee, Belgium) according to manufacturer's instructions. The sub-cell line 1301 of CCRF-CEM, known for its long telomeres was treated in a similar way and used as an internal control. The relative telomere length was calculated using the following formula, comparing the median fluorescence intensity (MFI) of the FITC signal of the samples to that of the sub-cell line.

$$\text{RTL} = \frac{(\text{MFI of sample cells with probe} - \text{MFI of sample cells without probe}) \times \text{DNA index of control cells (=2)}}{(\text{MFI of cell line with probe} - \text{MFI of cell line without probe}) \times \text{DNA index of sample cells (=1)}} \times 100\%$$
